# Supplementary material
Source: PubMed Central journal article supplement (PMC5261832)
Supplement: NIHMS818255-supplement-01.pdf [file NIHMS818255-supplement-01.pdf]

SUPPLEMENT TABLE 1: Participant characteristics of the DOR case cohort and SWAN comparison cohort by race/ethnic groups

| Variable                  | DOR (n=129)         |                              |                 |                | SWAN (n=803)         |                                |                  |                |
|---------------------------|---------------------|------------------------------|-----------------|----------------|----------------------|--------------------------------|------------------|----------------|
|                           | Caucasian<br>(n=95) | African<br>American<br>(n=5) | Asian<br>(n=22) | Other<br>(n=7) | Caucasian<br>(n=386) | African<br>American<br>(n=219) | Asian<br>(n=198) | Other<br>(n=0) |
| Age at enrollment         |                     |                              |                 |                |                      |                                |                  |                |
| mean (SD)                 | 37.9 (4.3)          | 41.6 (2.4)                   | 37.7 (3.20)     | 36.1 (3.6)     | 37.9 (4.5)           | 41.6 (2.4)                     | 37.7 (3.2)       | NA             |
| median                    | 38.6                | 42.0                         | 37.9            | 34.7           | 38.6                 | 42.0                           | 37.9             |                |
| range                     | 26.6-49.2           | 38.5-44.7                    | 31.4-41.7       | 31.3-40.9      | 26.6-49.2            | 38.5-44.7                      | 31.4-41.7        |                |
| Marital Status (%)        |                     |                              |                 |                |                      |                                |                  |                |
| Single/never married      | 5 (9.1%)            | 1 (33.3%)                    | 0 (0%)          | 0 (0%)         | 28 (7.4%)            | 33 (16.5%)                     | 3 (1.5%)         | NA             |
| Married/living as married | 47 (85.5%)          | 2 (66.7%)                    | 1 (100%)        | 3 (100%)       | 275 (72.6%)          | 101 (50.5%)                    | 167 (84.8%)      |                |
| Separated                 | 1 (1.8%)            | 0 (0%)                       | 0 (0%)          | 0 (0%)         | 8 (2.1%)             | 14 (7.0%)                      | 3 (1.5%)         |                |
| Widowed                   | 2 (3.6%)            | 0 (0%)                       | 0 (0%)          | 0 (0%)         | 5 (1.3%)             | 13 (6.5%)                      | 6 (3.1%)         |                |
| Divorced                  | 0 (0%)              | 0 (0%)                       | 0 (0%)          | 0 (0%)         | 63 (16.6%)           | 39 (19.5%)                     | 18 (9.1%)        |                |
| Missing (n=31 cases)      |                     |                              |                 |                |                      |                                |                  |                |
| Ever Smoked (%)           | 15 (15.8%)          | 1 (20.0%)                    | 2 (9.1%)        | 0 (0%)         | 186 (48.2%)          | 103 (47.9%)                    | 42 (21.2%)       | NA             |
| Age at Diagnosis of DOR   |                     |                              |                 |                |                      |                                |                  |                |
| mean (SD)                 | 36.63 (4.2)         | 39.87 (1.7)                  | 36.6 (3.3)      | 34.3 (3.5)     | NA                   | NA                             | NA               | NA             |

|           |             |             |             |             |             |             |             |    |
|-----------|-------------|-------------|-------------|-------------|-------------|-------------|-------------|----|
| median    | 37.8        | 39.8        | 37.2        | 33.7        |             |             |             |    |
| range     | 25.8-42.5   | 37.9-42.6   | 30.6-41.5   | 29.6-38.3   |             |             |             |    |
| Parity    |             |             |             |             |             |             |             |    |
| mean (SD) | 0.31 (0.58) | 0.20 (0.45) | 0.23 (0.53) | 0.17 (0.41) | 2.16 (1.29) | 2.71 (1.42) | 2.10 (0.96) | NA |
| median    | 0.00        | 0.00        | 0.00        | 0.00        | 2.00        | 3.00        | 2.00        |    |
| range     | 0-2         | 0-1         | 0-2         | 0-1         | 0-9         | 0-9         | 0-5         |    |
| Gravidity |             |             |             |             |             |             |             |    |
| mean (SD) | 1.07 (1.20) | 1.00 (1.00) | 1.59 (1.50) | 1.43 (1.51) | 2.98 (1.66) | 3.42 (1.68) | 2.95 (1.46) | NA |
| median    | 1.00        | 1.00        | 1.00        | 1.00        | 3.00        | 3.00        | 3.00        |    |
| range     | 0-5         | 0-2         | 0-5         | 0-4         | 1-12        | 1-11        | 1-11        |    |

---
